# Supplementary material for: Postglacial environmental changes in the northwestern Barents Sea caused by meltwater outbursts
Source: Copernicus journal article supplement (doi:10.5194/cp-2024-52), 2024-08-13
Supplement: Supplementary file 1 [file cp-2024-52-supplement.pdf]

## Supplementary figure

Figure 1

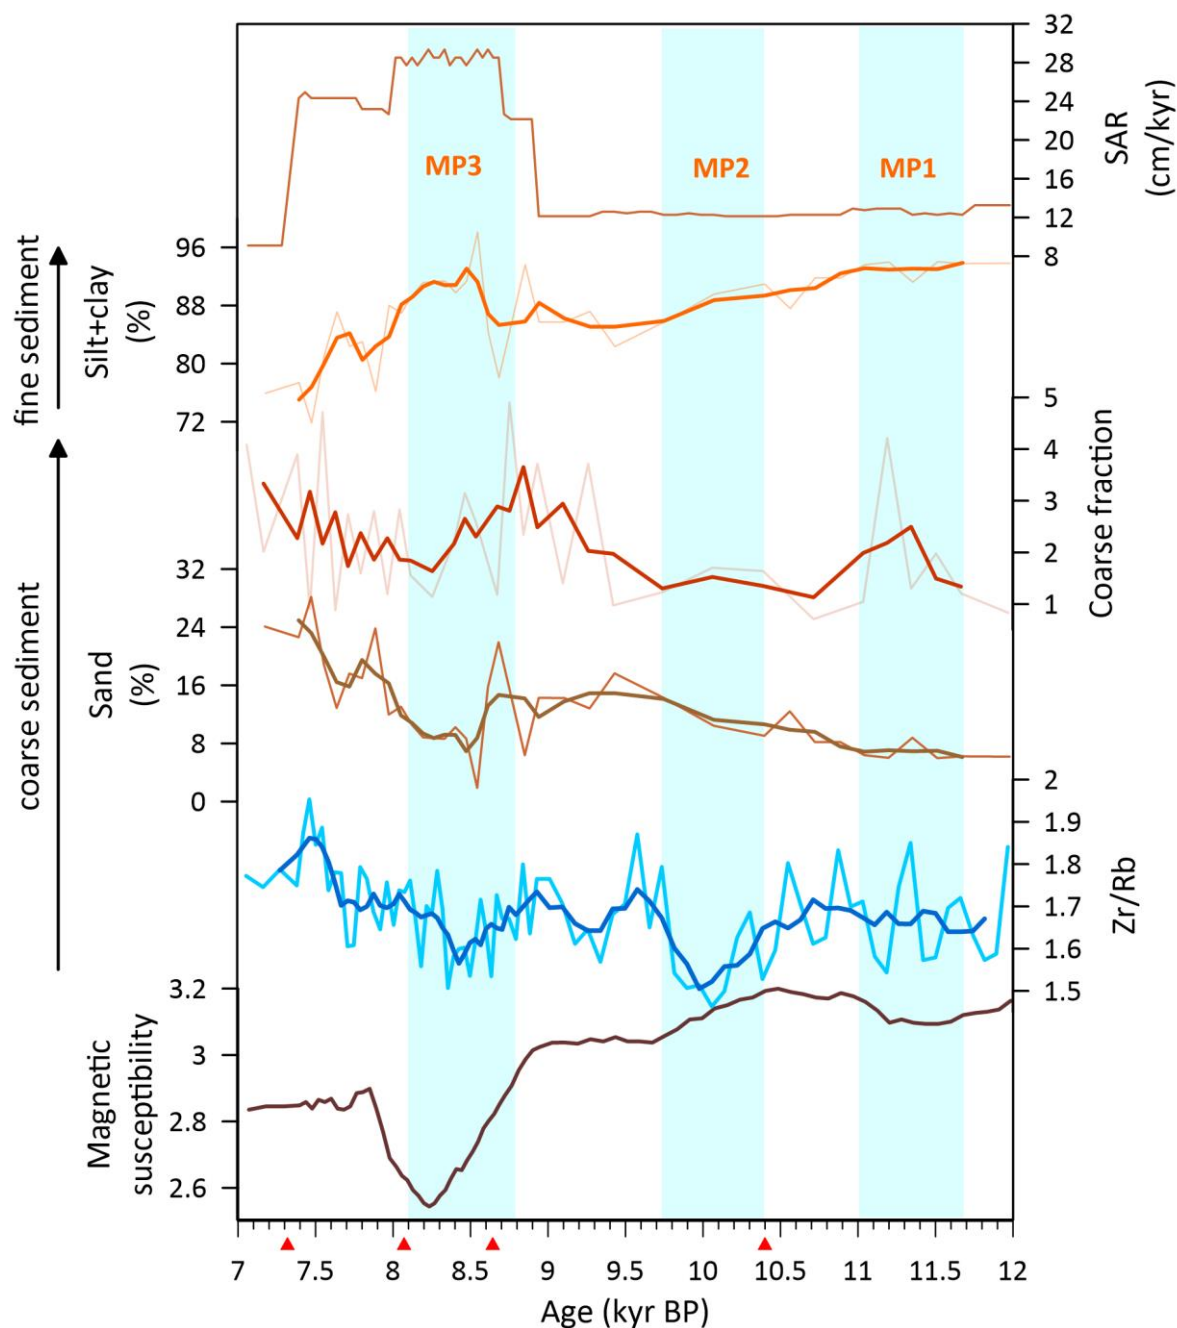

**Supplementary 1.** Proxy records of early Holocene meltwater events. From bottom to top: magnetic susceptibility, Zr/Rb, percentage of sand content, coarse fraction (>63µm), percentage fine sediment content (silt+clay), and sediment accumulation rate (SAR). Blue shadings indicate meltwater pulses (MP1, MP2, and MP3). Red triangles next to the x-axis indicate radiocarbon dates.
